# Supplementary material
Source: PubMed Central journal article supplement (PMC9387906)
Supplement: cd-21-1273_table_s1_suppst1.pdf [file cd-21-1273_table_s1_suppst1.pdf]

Mouse identifier

Isolates cultured from distal colons  
(tightly adherent)

Isolates cultured from distal colon washes  
(loosely adherent)

| Bacterial species                                      | Day 4  | Day 4  | Day 7  | Day 7  | Wk 2   | Wk 2   | Wk 4   | Wk 4   | Wk 8   | Wk 8   | Day 4  | Day 4  | Day 7  | Day 7  | Wk 2   | Wk 2   | Wk 4   | Wk 4   | Wk 8   | Wk 8   |  |  |
|--------------------------------------------------------|--------|--------|--------|--------|--------|--------|--------|--------|--------|--------|--------|--------|--------|--------|--------|--------|--------|--------|--------|--------|--|--|
|                                                        | M155 D | M156 D | M160 D | M161 D | M166 D | M167 D | M171 D | M172 D | M176 D | M177 D | M155 W | M156 W | M160 W | M161 W | M166 W | M167 W | M171 W | M172 W | M176 W | M177 W |  |  |
| <i>Bacteroides dorei</i>                               |        |        |        |        |        |        |        |        |        |        |        |        |        |        |        |        |        |        |        |        |  |  |
| <i>Erysipelatoclostridium ramosum</i> <sup>1</sup>     |        |        |        |        |        |        |        |        |        |        |        |        |        |        |        |        |        |        |        |        |  |  |
| <i>Clostridioides difficile</i> <sup>2</sup>           |        |        |        |        |        |        |        |        |        |        |        |        |        |        |        |        |        |        |        |        |  |  |
| <i>Clostridium</i> _sp_7_2_43F AA (from sequencing)    |        |        |        |        |        |        |        |        |        |        |        |        |        |        |        |        |        |        |        |        |  |  |
| <i>Clostridium innocuum</i>                            |        |        |        |        |        |        |        |        |        |        |        |        |        |        |        |        |        |        |        |        |  |  |
| <i>Enterococcus gallinarum</i>                         |        |        |        |        |        |        |        |        |        |        |        |        |        |        |        |        |        |        |        |        |  |  |
| <i>Enterococcus hirae</i>                              |        |        |        |        |        |        |        |        |        |        |        |        |        |        |        |        |        |        |        |        |  |  |
| <i>Ruminococcus gnavus</i>                             |        |        |        |        |        |        |        |        |        |        |        |        |        |        |        |        |        |        |        |        |  |  |
| <i>Klebsiella pneumoniae</i>                           |        |        |        |        |        |        |        |        |        |        |        |        |        |        |        |        |        |        |        |        |  |  |
| <i>Parabacteroides distasonis</i>                      |        |        |        |        |        |        |        |        |        |        |        |        |        |        |        |        |        |        |        |        |  |  |
| <i>Clostridium aldense</i>                             |        |        |        |        |        |        |        |        |        |        |        |        |        |        |        |        |        |        |        |        |  |  |
| <i>Enterococcus faecium</i>                            |        |        |        |        |        |        |        |        |        |        |        |        |        |        |        |        |        |        |        |        |  |  |
| <i>Blautia coccooides</i>                              |        |        |        |        |        |        |        |        |        |        |        |        |        |        |        |        |        |        |        |        |  |  |
| <i>Enterococcus avium</i>                              |        |        |        |        |        |        |        |        |        |        |        |        |        |        |        |        |        |        |        |        |  |  |
| <i>Robinsoniella peoriensis</i>                        |        |        |        |        |        |        |        |        |        |        |        |        |        |        |        |        |        |        |        |        |  |  |
| <i>Clostridium butyricum</i>                           |        |        |        |        |        |        |        |        |        |        |        |        |        |        |        |        |        |        |        |        |  |  |
| <i>Hungateella hathewayi</i> <sup>3</sup>              |        |        |        |        |        |        |        |        |        |        |        |        |        |        |        |        |        |        |        |        |  |  |
| <i>Clostridium cadaveris</i>                           |        |        |        |        |        |        |        |        |        |        |        |        |        |        |        |        |        |        |        |        |  |  |
| <i>Clostridium disporicum</i>                          |        |        |        |        |        |        |        |        |        |        |        |        |        |        |        |        |        |        |        |        |  |  |
| <i>Alistipes onderdonkii</i>                           |        |        |        |        |        |        |        |        |        |        |        |        |        |        |        |        |        |        |        |        |  |  |
| <i>Clostridium symbiosum</i>                           |        |        |        |        |        |        |        |        |        |        |        |        |        |        |        |        |        |        |        |        |  |  |
| <i>Coprobacillus cateniformis</i>                      |        |        |        |        |        |        |        |        |        |        |        |        |        |        |        |        |        |        |        |        |  |  |
| <i>Flavonifractor plautii</i>                          |        |        |        |        |        |        |        |        |        |        |        |        |        |        |        |        |        |        |        |        |  |  |
| <i>Micrococcus luteus</i>                              |        |        |        |        |        |        |        |        |        |        |        |        |        |        |        |        |        |        |        |        |  |  |
| <i>Terrisporobacter glycolicus</i>                     |        |        |        |        |        |        |        |        |        |        |        |        |        |        |        |        |        |        |        |        |  |  |
| <i>Bacillus cereus</i> <sup>4</sup>                    |        |        |        |        |        |        |        |        |        |        |        |        |        |        |        |        |        |        |        |        |  |  |
| <i>Bacillus circulans</i>                              |        |        |        |        |        |        |        |        |        |        |        |        |        |        |        |        |        |        |        |        |  |  |
| <i>Gordonibacter pamelaiae</i>                         |        |        |        |        |        |        |        |        |        |        |        |        |        |        |        |        |        |        |        |        |  |  |
| <i>Bifidobacterium longum</i> <sup>4</sup>             |        |        |        |        |        |        |        |        |        |        |        |        |        |        |        |        |        |        |        |        |  |  |
| <i>Brevibacillus agri</i> <sup>4</sup>                 |        |        |        |        |        |        |        |        |        |        |        |        |        |        |        |        |        |        |        |        |  |  |
| <i>Clostridium intestinale</i>                         |        |        |        |        |        |        |        |        |        |        |        |        |        |        |        |        |        |        |        |        |  |  |
| <i>Enterococcus faecalis</i>                           |        |        |        |        |        |        |        |        |        |        |        |        |        |        |        |        |        |        |        |        |  |  |
| <i>Paraeggerthella hongkongensis</i> (from sequencing) |        |        |        |        |        |        |        |        |        |        |        |        |        |        |        |        |        |        |        |        |  |  |
| <i>Staphylococcus epidermidis</i> <sup>4</sup>         |        |        |        |        |        |        |        |        |        |        |        |        |        |        |        |        |        |        |        |        |  |  |

<sup>1</sup> Formerly *Clostridium ramosum*  
<sup>2</sup> Formerly *Clostridium difficile*  
<sup>3</sup> Formerly *Clostridium hathewayi*  
<sup>4</sup> Not included in 3728T isolate mixture

Table S1
