# Supplementary material
Source: PubMed Central journal article supplement (PMC9387906)
Supplement: cd-21-1273_table_s2_suppst2.pdf [file cd-21-1273_table_s2_suppst2.pdf]

| <i>C. difficile</i> strain (CIm = Clinical Isolate from germ-free mouse) | TcdA status | TcdB status | Toxin status by Vero cell assay (detects both TcdA and TcdB) | Binary toxin status (cdtA / cdtB) | Ribotype | Source (CRC = colorectal cancer, BF = biofilm, T = tumor, GF = germ-free, CDI = <i>C. difficile</i> infection) | Notes on source                                                                                                                                                                                       | Reference                                   |
|--------------------------------------------------------------------------|-------------|-------------|--------------------------------------------------------------|-----------------------------------|----------|----------------------------------------------------------------------------------------------------------------|-------------------------------------------------------------------------------------------------------------------------------------------------------------------------------------------------------|---------------------------------------------|
| CIm161_DC1_3728T (CIm_3728T)                                             | +           | +           | +                                                            | -/-                               | 485      | CRC patient BF+T -> GF mouse                                                                                   | 3728T slurry-gavaged GF Min mice (distal colon tissue from mouse 161, distal colon isolate 1)                                                                                                         | This study                                  |
| CIm2663_BF+T mix (CIm_3728T)                                             | +           | +           | +                                                            | -/-                               | 485      | CRC patient BF+T mix -> GF mouse                                                                               | BF+T mixed slurry-gavaged GF Min mice (stool from mouse 2663 at University of Florida)                                                                                                                | This study; Tomkovich and Dejea et al. 2019 |
| CIm313_3752T                                                             | +           | +           | +                                                            | -/-                               | 014-020  | CRC patient BF+T -> GF mouse                                                                                   | 3752T slurry-gavaged GF Min mice (stool from mouse 313)                                                                                                                                               | This study                                  |
| ATCC 700057 (VPI 11186)                                                  | -           | -           | nd                                                           | -/-                               | 038      |                                                                                                                | ATCC                                                                                                                                                                                                  |                                             |
| ATCC 9689 (90556-M6S)                                                    | +           | +           | nd                                                           | -/-                               | 001      |                                                                                                                | ATCC                                                                                                                                                                                                  |                                             |
| 630Δerm WT                                                               | +           | +           | nd                                                           | -/-                               | 012      | CDI patient                                                                                                    | Parent 630 strain was isolated from a patient with pseudomembranous colitis and was associated with a hospital outbreak in Switzerland in 1979-1980; current strain has been extensively lab passaged | Wust et al. 1982; Lyras et al. 2009         |
| 630Δerm tcdB-                                                            | +           | -           | nd                                                           | -/-                               | 012      | CDI patient                                                                                                    |                                                                                                                                                                                                       | Lyras et al. 2009                           |
| M7404 WT (BI/NAP1/027)                                                   | +           | +           | +                                                            | +/+                               | 027      | CDI patient                                                                                                    | Canadian epidemic strain                                                                                                                                                                              | Carter et al. 2015                          |
| M7404 tcdA-                                                              | -           | +           | +                                                            | +/+                               | 027      | CDI patient                                                                                                    |                                                                                                                                                                                                       | Carter et al. 2015                          |
| M7404 tcdB-                                                              | +           | -           | +                                                            | +/+                               | 027      | CDI patient                                                                                                    |                                                                                                                                                                                                       | Carter et al. 2015                          |
| M7404 tcdA-B-                                                            | -           | -           | -                                                            | +/+                               | 027      | CDI patient                                                                                                    |                                                                                                                                                                                                       | Carter et al. 2015                          |

Table S2
