# Supplementary material
Source: PubMed Central journal article supplement (PMC9387906)
Supplement: cd-21-1273_table_s4_suppst4.pdf [file cd-21-1273_table_s4_suppst4.pdf]

| Staining      | Target          | Fluorophore | Clone       |
|---------------|-----------------|-------------|-------------|
| Viability dye | Aqua            | V510        | NA          |
| Surface       | CD45.2          | UV805       | 104         |
| Surface       | THY1.2          | UV395       | 53-2.1      |
| Surface       | CD3e            | UV496       | 145-2C11    |
| Surface       | gdTCR           | AF488       | GL3         |
| Surface       | CD4             | V421        | GK1.5       |
| Surface       | CD8             | APC-Cy7     | 53-6.7      |
| Surface       | CD19            | APC-Cy7     | 1D3         |
| Surface       | Ly-6A/E (Sca-1) | BUV563      | D7          |
| Surface       | IL-33R (ST2)    | PE-Cy7      | RMST2-33    |
| Surface       | IL-25R          | efluor660   | MUNC33      |
| Surface       | Nkp46           | AF700/R700  | 29A1.4      |
| Surface       | PD-1            | BB700       | J43         |
| Surface       | CXCR5           | UV737       | 2G8         |
| Surface       | CD11c           | V650        | HL3         |
| Surface       | I-E/A           | V570        | M5/114.15.2 |
| Surface       | CD103           | UV615       | M290        |
| Surface       | CD11b           | V750        | M1/70       |
| Surface       | f4/80           | V711        | T45-2342    |
| Surface       | Ly6G            | UV395       | 1A8         |
| Surface       | Ly6C            | APC-Cy7     | AL-21       |
| Intracellular | FOXP3           | AF488       | FJK16S      |
| Intracellular | TBET            | BB790       | O4-46       |
| Intracellular | EOMES           | PECF594     | X4-83       |
| Intracellular | GATA3           | BB630       | L50-823     |
| Intracellular | RORGT           | PE-cy5      | Q31-378     |
| Intracellular | BCL-6           | BB660       | K112-91     |
| Intracellular | IFNg            | BV605       | xmg1.2      |
| Intracellular | IL-17A          | V786        | TC11-18H10  |
| Intracellular | IL-4            | UV661       | 11B11       |
| Intracellular | IL-22           | PE          | 1H8PWSR     |

Table S4
